# Supplementary material
Source: publisher figshare collection journal article supplement (https://sage.figshare.com/ndownloader/files/12419660)
Supplement: Supplementary file 1 [file 12419660]

## Appendix A: List of Items Included in Survey

| Gambling Context   | Gambling Activity Items                                                                                                                          |
|--------------------|--------------------------------------------------------------------------------------------------------------------------------------------------|
| Offline            | ... buying lottery tickets, scratch-cards, raffles or fundraising tickets                                                                        |
|                    | ... betting (includes: horse races, sports pools, sports betting, or "specials" betting such as on tv shows or political events)                 |
|                    | ... playing roulette, keno, or bingo                                                                                                             |
|                    | ... playing gaming machines (includes: slot machines, fruit machines, pachinko, video poker and other electronic gaming machines)                |
|                    | ... playing card games other than poker                                                                                                          |
|                    | ... playing poker                                                                                                                                |
|                    | ... playing dice games                                                                                                                           |
|                    | Other (please specify):                                                                                                                          |
| Online             | ... buying lottery tickets, scratchcards, raffles or fundraising tickets                                                                         |
|                    | ... betting (includes: horse races, sports pools, sports betting, fantasy sports, or "specials" betting such as on tv shows or political events) |
|                    | ... playing online roulette, keno or bingo                                                                                                       |
|                    | ... playing online slot machines/fruit machines                                                                                                  |
|                    | ... playing online card games other than poker                                                                                                   |
|                    | ... playing poker                                                                                                                                |
|                    | ... playing online dice games                                                                                                                    |
|                    | Other (please specify):                                                                                                                          |
| Video Game-Related | ... betting on eSports matches                                                                                                                   |
|                    | ... entering skins lotteries                                                                                                                     |
|                    | ... opening loot crates/cases                                                                                                                    |
|                    | ... P2P betting/skill game betting (betting on yourself via sites such as Skillz)                                                                |
|                    | ... on fantasy eSports games                                                                                                                     |
|                    | ... playing Casino-style games (e.g. roulette, slot machines, dice games) using skins as wagers                                                  |

... playing card games (not including poker) using skins as wagers

... playing poker using skins as wagers

Other (please specify):

## Appendix B:

### Gambling engagement Crosstabulated With Esports Engagement.

[illegible]

|                                       |                             |             |               |               |              |               |                  |            |             |                  |
|---------------------------------------|-----------------------------|-------------|---------------|---------------|--------------|---------------|------------------|------------|-------------|------------------|
|                                       |                             | 1.4<br>(8)  | 6<br>(35)     | 9.3<br>(54)   | 1.7<br>(10)  | 18.4<br>(107) |                  |            |             |                  |
|                                       | <i>Medium</i>               | 1.2<br>(7)  | 2.4<br>(14)   | 6.9<br>(40)   | 1.2<br>(7)   | 11.6<br>(68)  |                  |            |             |                  |
|                                       | <i>High</i>                 | 0.3<br>(2)  | 0.7<br>(4)    | 3.1<br>(18)   | 2.1<br>(12)  | 6.2<br>(36)   |                  |            |             |                  |
|                                       | <i>Total %</i>              | 8.2<br>(48) | 26.5<br>(154) | 55.2<br>(321) | 10.1<br>(59) | 100<br>(582)  |                  |            |             |                  |
|                                       | <i>Does Not Participate</i> | 6<br>(35)   | 21.1<br>(123) | 36.8<br>(214) | 3.8<br>(22)  | 67.7<br>(394) |                  |            |             |                  |
|                                       | <i>Low</i>                  | 1.4<br>(8)  | 4.1<br>(24)   | 5.8<br>(34)   | 2.4<br>(14)  | 13.7<br>(80)  |                  |            |             |                  |
| <i>Video Game Gambling Engagement</i> | <i>Medium</i>               | 0.9<br>(5)  | 1.2<br>(7)    | 8.2<br>(48)   | 1.5<br>(9)   | 11.9<br>(69)  | <b>&lt; .001</b> | <b>.24</b> | <b>.219</b> | <b>&lt; .001</b> |
|                                       | <i>High</i>                 | 0<br>(-)    | 0<br>(-)      | 4.3<br>(25)   | 2.4<br>(14)  | 6.7<br>(39)   |                  |            |             |                  |
|                                       | <i>Total %</i>              | 8.2<br>(48) | 26.5<br>(154) | 55.2<br>(321) | 10.1<br>(59) | 100<br>(582)  |                  |            |             |                  |
| <i>Loot Box Purchase Engagement</i>   | <i>Does Not Participate</i> | 5.7<br>(33) | 19.9<br>(116) | 40.4<br>(235) | 8.2<br>(48)  | 74.2<br>(432) | <b>.039</b>      | -.019      | -.016       | .674             |

|                |             |               |               |              |              |
|----------------|-------------|---------------|---------------|--------------|--------------|
| <i>Low</i>     | 1.2<br>(7)  | 4.3<br>(25)   | 7.2<br>(42)   | 0.3<br>(2)   | 13.1<br>(76) |
| <i>Medium</i>  | 1.4<br>(8)  | 2.2<br>(13)   | 6.7<br>(39)   | 1<br>(6)     | 11.3<br>(66) |
| <i>High</i>    | 0<br>(-)    | 0<br>(-)      | 0.9<br>(5)    | 0.5<br>(3)   | 1.4<br>(8)   |
| <i>Total %</i> | 8.2<br>(48) | 26.5<br>(154) | 55.2<br>(321) | 10.1<br>(59) | 100<br>(582) |

---

Engagement, combines measures of: frequency, average weekly hours spent watching, and average monthly spend.

---

## Appendix C:

### PGSI Classification by Gambling Context

| <i>PGSI Classification by Gambling Context</i>      |                    |            |                 |            |                      |          |                        |          |              |
|-----------------------------------------------------|--------------------|------------|-----------------|------------|----------------------|----------|------------------------|----------|--------------|
|                                                     | <i>PGSI Group</i>  |            |                 |            |                      |          |                        |          | <i>Total</i> |
|                                                     | <i>Non-problem</i> | <i>(%)</i> | <i>Low Risk</i> | <i>(%)</i> | <i>Moderate Risk</i> | <i>%</i> | <i>Problem Gambler</i> | <i>%</i> |              |
| <i>Don't Gamble</i>                                 | 156                | (78.4)     | 27              | (13.6)     | 14                   | (7)      | 2                      | (1)      | 199          |
| <i>Offline Gambling Only</i>                        | 42                 | (61.8)     | 20              | (29.4)     | 6                    | (8.8)    | 0                      | (0)      | 68           |
| <i>Online Gambling Only</i>                         | 7                  | (46.7)     | 2               | (13.3)     | 5                    | (33.3)   | 1                      | (6.7)    | 15           |
| <i>VG Gambling Only</i>                             | 9                  | (42.9)     | 5               | (23.8)     | 5                    | (23.8)   | 2                      | (9.5)    | 21           |
| <i>Offline and Online Gambling</i>                  | 7                  | (31.8)     | 12              | (54.5)     | 2                    | (9.1)    | 1                      | (4.5)    | 22           |
| <i>Offline and VG Gambling</i>                      | 4                  | (36.4)     | 4               | (36.4)     | 3                    | (27.3)   | 0                      | (0)      | 11           |
| <i>Online and VG Gambling</i>                       | 4                  | (8.2)      | 25              | (51)       | 19                   | (38.8)   | 1                      | (2)      | 49           |
| <i>Offline, Online, and VG Gambling</i>             | 8                  | (17)       | 14              | (29.8)     | 17                   | (36.2)   | 8                      | (17)     | 47           |
| <i>Opening Loot Boxes Only</i>                      | 21                 | (48.8)     | 15              | (34.9)     | 4                    | (9.3)    | 3                      | (7)      | 43           |
| <i>Offline and Loot Boxes</i>                       | 5                  | (55.6)     | 3               | (33.3)     | 1                    | (11.1)   | 0                      | (0)      | 9            |
| <i>Online and Loot Boxes</i>                        | 13                 | (68.4)     | 2               | (10.5)     | 3                    | (15.8)   | 1                      | (5.3)    | 19           |
| <i>VG Gambling and Loot Boxes</i>                   | 4                  | (33.3)     | 2               | (16.7)     | 5                    | (41.7)   | 1                      | (8.3)    | 12           |
| <i>Offline, Online, and Loot Boxes</i>              | 3                  | (15.8)     | 10              | (52.6)     | 5                    | (26.3)   | 1                      | (5.3)    | 19           |
| <i>Online, VG Gambling, and Loot Boxes</i>          | 2                  | (8.7)      | 10              | (43.5)     | 9                    | (39.1)   | 2                      | (8.7)    | 23           |
| <i>Offline, VG Gambling, and Loot Boxes</i>         | 2                  | (25)       | 3               | (37.5)     | 1                    | (12.5)   | 2                      | (25)     | 8            |
| <i>Offline, Online, VG Gambling, and Loot Boxes</i> | 2                  | (11.8)     | 8               | (47.1)     | 6                    | (35.3)   | 1                      | (5.9)    | 17           |
| <i>Total</i>                                        | 289                | (49.7)     | 162             | (27.8)     | 105                  | (18)     | 26                     | (4.5)    | 582          |

Note: Due to the ongoing debate as to whether or not opening loot boxes constitutes gambling, the activity has been separated from other forms of gambling investigated in this work.

Appendix D:

PGSI Category by Gambling Engagement.

*Problem Gambling by Engagement with Different Gambling Contexts*

|                                       |                             | PGSI Group           |                   |                        |                          |                | Fisher's         | Directional and Symmetric Measures |              |                  |
|---------------------------------------|-----------------------------|----------------------|-------------------|------------------------|--------------------------|----------------|------------------|------------------------------------|--------------|------------------|
|                                       |                             | Non-problem<br>% (n) | Low Risk<br>% (n) | Moderate Risk<br>% (n) | Problem Gambler<br>% (n) | Total<br>% (n) | p                | Δ                                  | τ            | p                |
| <i>Offline Gambling Engagement</i>    | <i>Does Not Participate</i> | 37.1<br>(216)        | 15.1<br>(88)      | 11<br>(64)             | 2.2<br>(13)              | 65.5<br>(381)  |                  |                                    |              |                  |
|                                       | <i>Low</i>                  | 8.4<br>(49)          | 6.2<br>(36)       | 2.4<br>(14)            | 0.7<br>(4)               | 17.7<br>(103)  |                  |                                    |              |                  |
|                                       | <i>Medium</i>               | 4<br>(23)            | 5.2<br>(30)       | 3.4<br>(20)            | 1<br>(6)                 | 13.6<br>(79)   | <b>&lt; .001</b> | <b>0.208</b>                       | <b>0.188</b> | <b>&lt; .001</b> |
|                                       | <i>High</i>                 | 0.2<br>(1)           | 1.4<br>(8)        | 1.2<br>(7)             | 0.5<br>(3)               | 3.3<br>(19)    |                  |                                    |              |                  |
|                                       | <i>Total %</i>              | 49.6<br>(289)        | 27.8<br>(162)     | 18<br>(105)            | 4.6<br>(26)              | 100<br>(582)   |                  |                                    |              |                  |
| <i>Online Gambling Engagement</i>     | <i>Does Not Participate</i> | 41.8<br>(243)        | 13.6<br>(79)      | 6.7<br>(39)            | 1.7<br>(10)              | 63.7<br>(371)  |                  |                                    |              |                  |
|                                       | <i>Low</i>                  | 5.5<br>(32)          | 7.7<br>(45)       | 4.5<br>(26)            | 0.7<br>(4)               | 18.4<br>(107)  |                  |                                    |              |                  |
|                                       | <i>Medium</i>               | 1.7<br>(10)          | 4.5<br>(26)       | 4.8<br>(28)            | 0.7<br>(4)               | 11.7<br>(68)   | <b>&lt; .001</b> | <b>0.437</b>                       | <b>0.402</b> | <b>&lt; .001</b> |
|                                       | <i>High</i>                 | 0.7<br>(4)           | 2.1<br>(12)       | 2.1<br>(12)            | 1.4<br>(8)               | 6.2<br>(36)    |                  |                                    |              |                  |
|                                       | <i>Total %</i>              | 49.6<br>(289)        | 27.8<br>(162)     | 18<br>(105)            | 4.6<br>(26)              | 100<br>(582)   |                  |                                    |              |                  |
| <i>Video Game Gambling Engagement</i> | <i>Does Not Participate</i> | 43.6<br>(254)        | 15.6<br>(91)      | 6.9<br>(40)            | 1.5<br>(9)               | 67.7<br>(394)  | <b>&lt; .001</b> | <b>0.479</b>                       | <b>0.424</b> | <b>&lt; .001</b> |



|                                   |                             |               |               |              |             |               |                  |              |              |                  |
|-----------------------------------|-----------------------------|---------------|---------------|--------------|-------------|---------------|------------------|--------------|--------------|------------------|
|                                   | <i>Low</i>                  | 4<br>(23)     | 5.3<br>(31)   | 4.1<br>(24)  | 0.3<br>(2)  | 13.7<br>(80)  |                  |              |              |                  |
|                                   | <i>Medium</i>               | 1.4<br>(8)    | 4.8<br>(28)   | 4.3<br>(25)  | 1.4<br>(8)  | 11.9<br>(69)  |                  |              |              |                  |
|                                   | <i>High</i>                 | 0.7<br>(4)    | 2.1<br>(12)   | 2.7<br>(16)  | 1.2<br>(7)  | 6.7<br>(39)   |                  |              |              |                  |
|                                   | <i>Total %</i>              | 49.6<br>(289) | 27.8<br>(162) | 18<br>(105)  | 4.6<br>(26) | 100<br>(582)  |                  |              |              |                  |
|                                   | <i>Does Not Participate</i> | 40.7<br>(237) | 18.7<br>(109) | 12.2<br>(71) | 2.6<br>(15) | 74.2<br>(432) |                  |              |              |                  |
|                                   | <i>Low</i>                  | 5.3<br>(31)   | 4.8<br>(28)   | 2.4<br>(14)  | 0.5<br>(3)  | 11.3<br>(76)  |                  |              |              |                  |
| <i>Lot Box Opening Engagement</i> | <i>Medium</i>               | 3.6<br>(21)   | 4<br>(23)     | 2.7<br>(16)  | 1<br>(6)    | 11.3<br>(66)  | <b>&lt; .001</b> | <b>0.213</b> | <b>0.172</b> | <b>&lt; .001</b> |
|                                   | <i>High</i>                 | 0<br>(-)      | 0.3<br>(2)    | 0.7<br>(4)   | 0.3<br>(2)  | 1.4<br>(8)    |                  |              |              |                  |
|                                   | <i>Total %</i>              | 49.6<br>(289) | 27.8<br>(162) | 18<br>(105)  | 4.6<br>(26) | 100<br>(582)  |                  |              |              |                  |

Engagement combines measures of: frequency, average weekly hours spent watching, and average monthly spend.

## Appendix E:

### Gambling channels and Problem Gambling Rates

|                        | <i>Gambling only</i>       |                 |                      |                        |              |                                                                    | <i>Gambling and Loot Box Purchasing</i> |                 |                      |                        |              |                                                                    |
|------------------------|----------------------------|-----------------|----------------------|------------------------|--------------|--------------------------------------------------------------------|-----------------------------------------|-----------------|----------------------|------------------------|--------------|--------------------------------------------------------------------|
|                        | <i>PGSI Group</i>          |                 |                      |                        |              | <i>% Rated as Problematic and Potentially Problematic Gamblers</i> | <i>PGSI Group</i>                       |                 |                      |                        |              | <i>% Rated as Problematic and Potentially Problematic Gamblers</i> |
|                        | <i>Non-problem Gambler</i> | <i>Low Risk</i> | <i>Moderate Risk</i> | <i>Problem Gambler</i> | <i>total</i> |                                                                    | <i>Non-problem Gambler</i>              | <i>Low Risk</i> | <i>Moderate Risk</i> | <i>Problem Gambler</i> | <i>total</i> |                                                                    |
| <i>Does not Gamble</i> | 156                        | 27              | 14                   | 2                      | 199          | 21.6                                                               | -                                       | -               | -                    | -                      | -            | -                                                                  |
|                        | 78.4                       | 13.6            | 7.0                  | 1.0                    |              |                                                                    | -                                       | -               | -                    | -                      |              |                                                                    |
| <i>Single Channel</i>  | 58.0                       | 27.0            | 16.0                 | 3.0                    | 104.0        | 44.2                                                               | 79.0                                    | 42.0            | 20.0                 | 6.0                    | 147.0        | 46.3                                                               |
|                        | 55.8                       | 26.0            | 15.4                 | 2.9                    |              |                                                                    | 53.7                                    | 28.6            | 13.6                 | 4.1                    |              |                                                                    |
| <i>2 Channel</i>       | 15.0                       | 41.0            | 24.0                 | 2.0                    | 82.0         | 81.7                                                               | 37.0                                    | 48.0            | 33.0                 | 4.0                    | 122.0        | 69.7                                                               |
|                        | 18.3                       | 50.0            | 29.3                 | 2.4                    |              |                                                                    | 30.3                                    | 39.3            | 27.0                 | 3.3                    |              |                                                                    |
| <i>3 channel</i>       | 8.0                        | 14.0            | 17.0                 | 8.0                    | 47.0         | 83.0                                                               | 15.0                                    | 37.0            | 32.0                 | 13.0                   | 97.0         | 84.5                                                               |
|                        | 17.0                       | 29.8            | 36.2                 | 17.0                   |              |                                                                    | 15.5                                    | 38.1            | 33.0                 | 13.4                   |              |                                                                    |
| <i>4 channel</i>       | -                          | -               | -                    | -                      | -            | -                                                                  | 2.0                                     | 8.0             | 6.0                  | 1.0                    | 17.0         | 88.2                                                               |
|                        | -                          | -               | -                    | -                      | -            |                                                                    | 11.8                                    | 47.1            | 35.3                 | 5.9                    |              |                                                                    |

% Rated as Problematic and Potentially Problematic Gamblers includes those rated as: "low risk", "moderate risk", and "problematic" gamblers

## Appendix F:

### Gambling channels and Esports Viewing Engagement

|                            | <i>Gambling only</i>                    |                                         |                                            |                                          |                    | <i>Gambling and Loot Box Purchasing</i> |                                         |                                            |                                          |                    |
|----------------------------|-----------------------------------------|-----------------------------------------|--------------------------------------------|------------------------------------------|--------------------|-----------------------------------------|-----------------------------------------|--------------------------------------------|------------------------------------------|--------------------|
|                            | <i>Esports Engagement</i>               |                                         |                                            |                                          | <i>Total<br/>n</i> | <i>Esports Engagement</i>               |                                         |                                            |                                          | <i>Total<br/>n</i> |
|                            | <i>Does Not<br/>Watch<br/>n<br/>(%)</i> | <i>Low<br/>Engagement<br/>n<br/>(%)</i> | <i>Medium<br/>Engagement<br/>n<br/>(%)</i> | <i>High<br/>Engagement<br/>n<br/>(%)</i> |                    | <i>Does Not<br/>Watch<br/>n<br/>(%)</i> | <i>Low<br/>Engagement<br/>n<br/>(%)</i> | <i>Medium<br/>Engagement<br/>n<br/>(%)</i> | <i>High<br/>Engagement<br/>n<br/>(%)</i> |                    |
| <i>Does not<br/>gamble</i> | 0<br>(0)                                | 55<br>(27.6)                            | 129<br>(64.8)                              | 15<br>(7.5)                              | 199                | -<br>-                                  | -<br>-                                  | -<br>-                                     | -<br>-                                   | -<br>-             |
| <i>Single<br/>Channel</i>  | 23<br>(22.1)                            | 33<br>(31.7)                            | 38<br>(36.5)                               | 10<br>(9.6)                              | 104                | 28<br>(19)                              | 49<br>(33.3)                            | 60<br>(40.8)                               | 10<br>(6.8)                              | 147                |
| <i>2 Channel</i>           | 9<br>(11)                               | 20<br>(24.4)                            | 43<br>(52.4)                               | 10<br>(12.2)                             | 82                 | 14<br>(11.5)                            | 30<br>(24.6)                            | 65<br>(53.3)                               | 13<br>(10.7)                             | 122                |
| <i>3 Channel</i>           | 1<br>(2.1)                              | 8<br>(17)                               | 25<br>(53.2)                               | 13<br>(27.7)                             | 47                 | 6<br>(6.2)                              | 18<br>(18.6)                            | 54<br>(55.7)                               | 19<br>(19.6)                             | 97                 |
| <i>4 Channel</i>           | -<br>-                                  | -<br>-                                  | -<br>-                                     | -<br>-                                   | -<br>-             | 0<br>(0)                                | 2<br>(11.8)                             | 13<br>(76.5)                               | 2<br>(11.8)                              | 17                 |
| <i>Total</i>               | 33<br>(14.2)                            | 61<br>(26.2)                            | 106<br>(45.5)                              | 33<br>(14.2)                             | 233                | 48<br>(12.5)                            | 99<br>(25.8)                            | 192<br>(50.1)                              | 44<br>(11.5)                             | 383                |
